# Supplementary material
Source: PubMed Central journal article supplement (PMC8462099)
Supplement: NIHMS1737151-supplement-Revised_Supplementary_material.pdf [file NIHMS1737151-supplement-Revised_Supplementary_material.pdf]

## **Supplemental information**

**Inositol serves as a natural inhibitor of mitochondrial fission by directly targeting AMPK**

**Che-Chia Hsu, Xian Zhang, Guihua Wang, Weina Zhang, Zhen Cai, Bo-Syong Pan, Haiwei Gu, Chuan Xu, Guoxiang Jin, Xiangshang Xu, Rajesh Kumar Manne, Yan Jin, Wei Yan, Jingwei Shao, Tingjin Chen, Emily Lin, Amit Ketkar, Robert Eoff, Zhi-Gang Xu, Zhong-Zhu Chen, Hong-Yu Li, Hui-Kuan Lin**

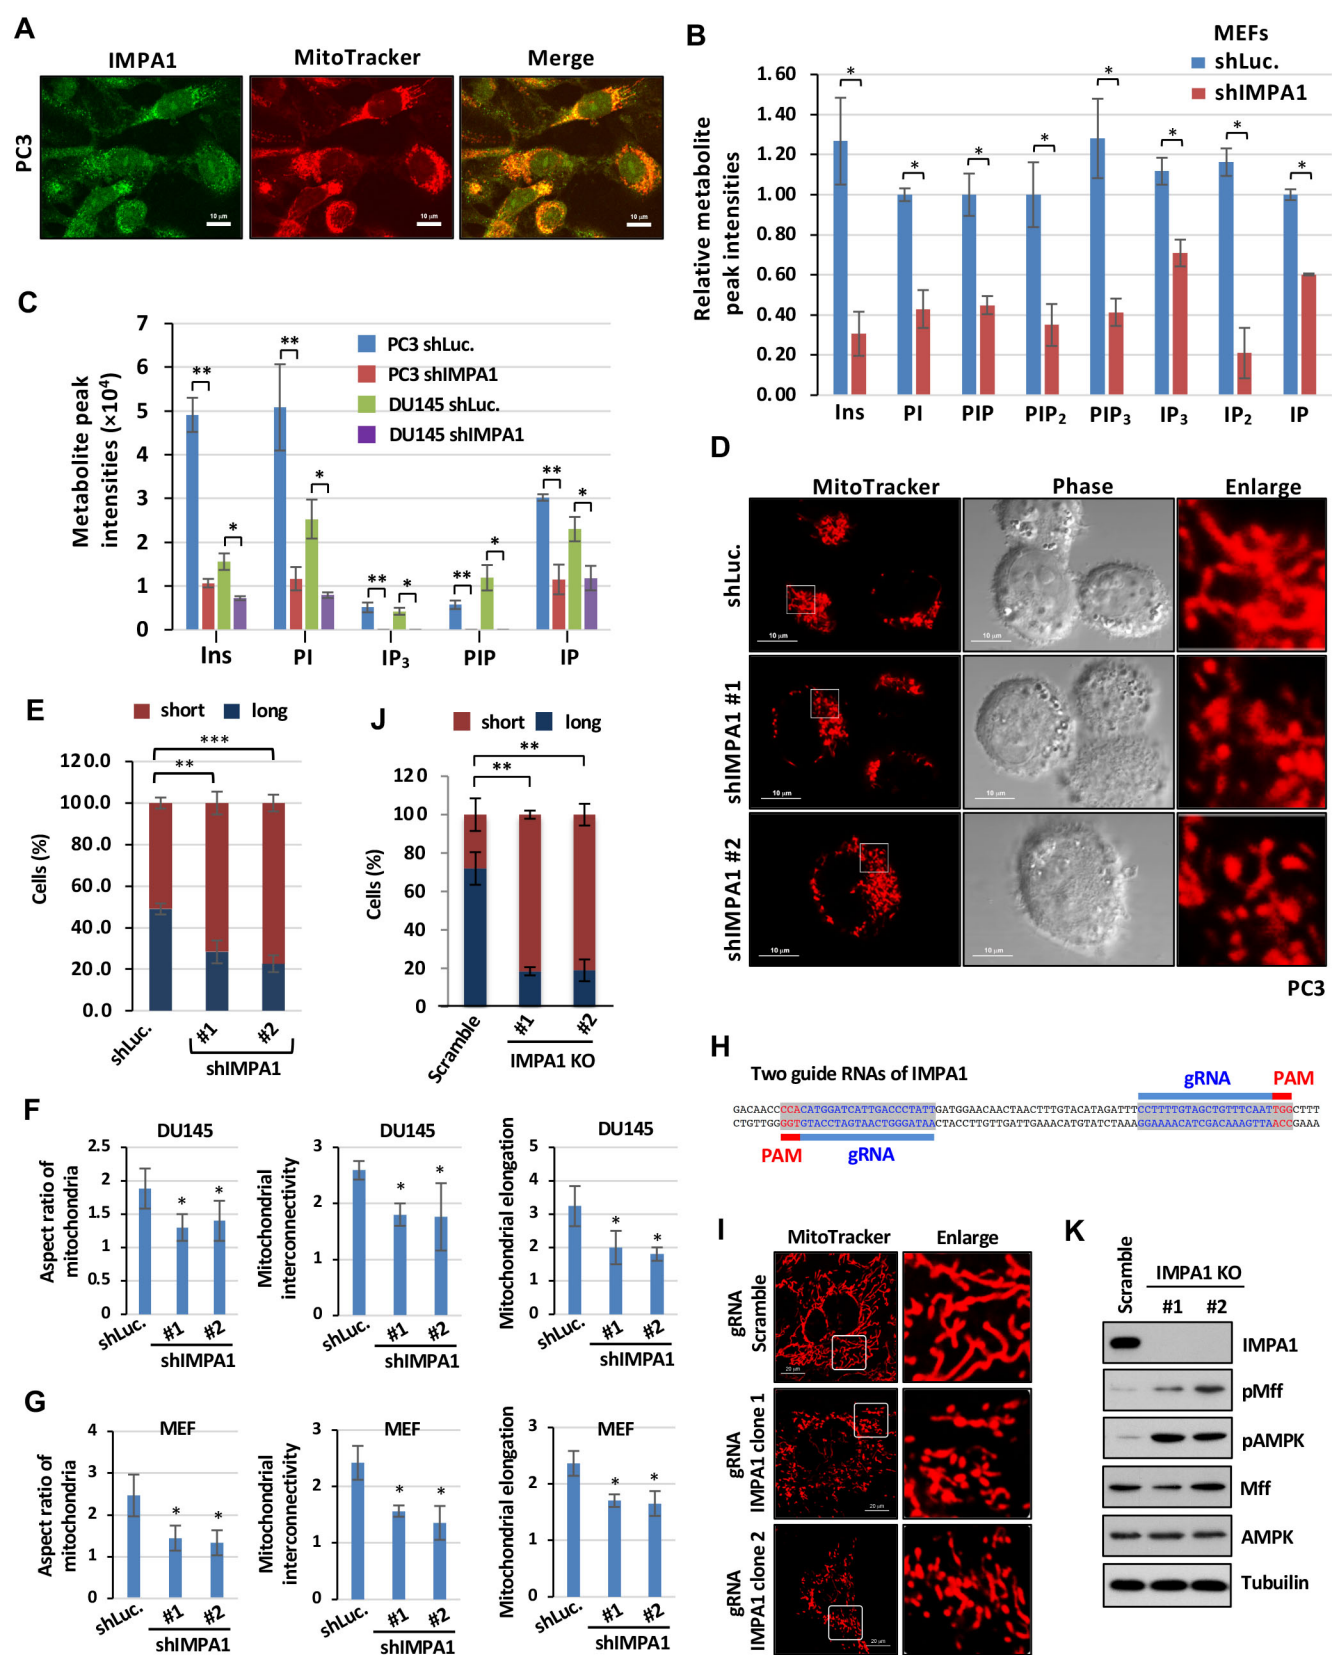

Figure S1

**Figure S1. IMPA1/2-derived Inositol inhibits mitochondrial fission, Related to Figure 1.**

(A) Confocal images of subcellular localization of IMPA1 by specific IMPA1 antibody in PC3. (B) Metabolic profiling MEFs expressing shLuc. or shIMPA1 was performed by targeted mass spectrometry analysis of phosphoinositides metabolism. (C) Metabolic profiling of PC3 or DU145 cells expressing shLuc. or shIMPA1 was performed by targeted mass spectrometry analysis of phosphoinositides metabolism. (D) Confocal images of mitochondrial morphology in PC3 cells stably transduced with shLuc. or shIMPA1. Scale bar, 10  $\mu$ m in MitoTracker. (E) Quantification of the mitochondrial morphology of PC3 cells shown in (D). Data are shown as the mean  $\pm$  SEM of three independent experiments with 100 cells counted for each replicate. (F) Graphic respectively represents individual mitochondrial aspects ratio, interconnectivity and elongation in DU145 cells expressing shLuc. or shIMPA1 after quantitative image analysis. Y axis of mitochondrial aspects ratio, interconnectivity and elongation is arbitrary unit. (G) Mitochondrial aspects ratio, interconnectivity and elongation in MEFs expressing shLuc. or shIMPA1 (#1 and #2) after quantitative image analysis. (H) Illustration of cDNA sequence of IMPA1 targeted by the guide RNA pairs for IMPA1 knockout by CRISPR/Cas9. (I) Confocal images with MitoTracker (Red) in DU145 cells stably transduced with the guide RNA pairs of scramble or IMPA1 (#1 and #2). (J) Quantification of the mitochondrial morphology of the cells shown in (I). (K) Immunoblotting of CRISPR/Cas9 knockout cells transduced with the guide RNA pairs of scramble or IMPA1 including two single clones (#1 and #2).

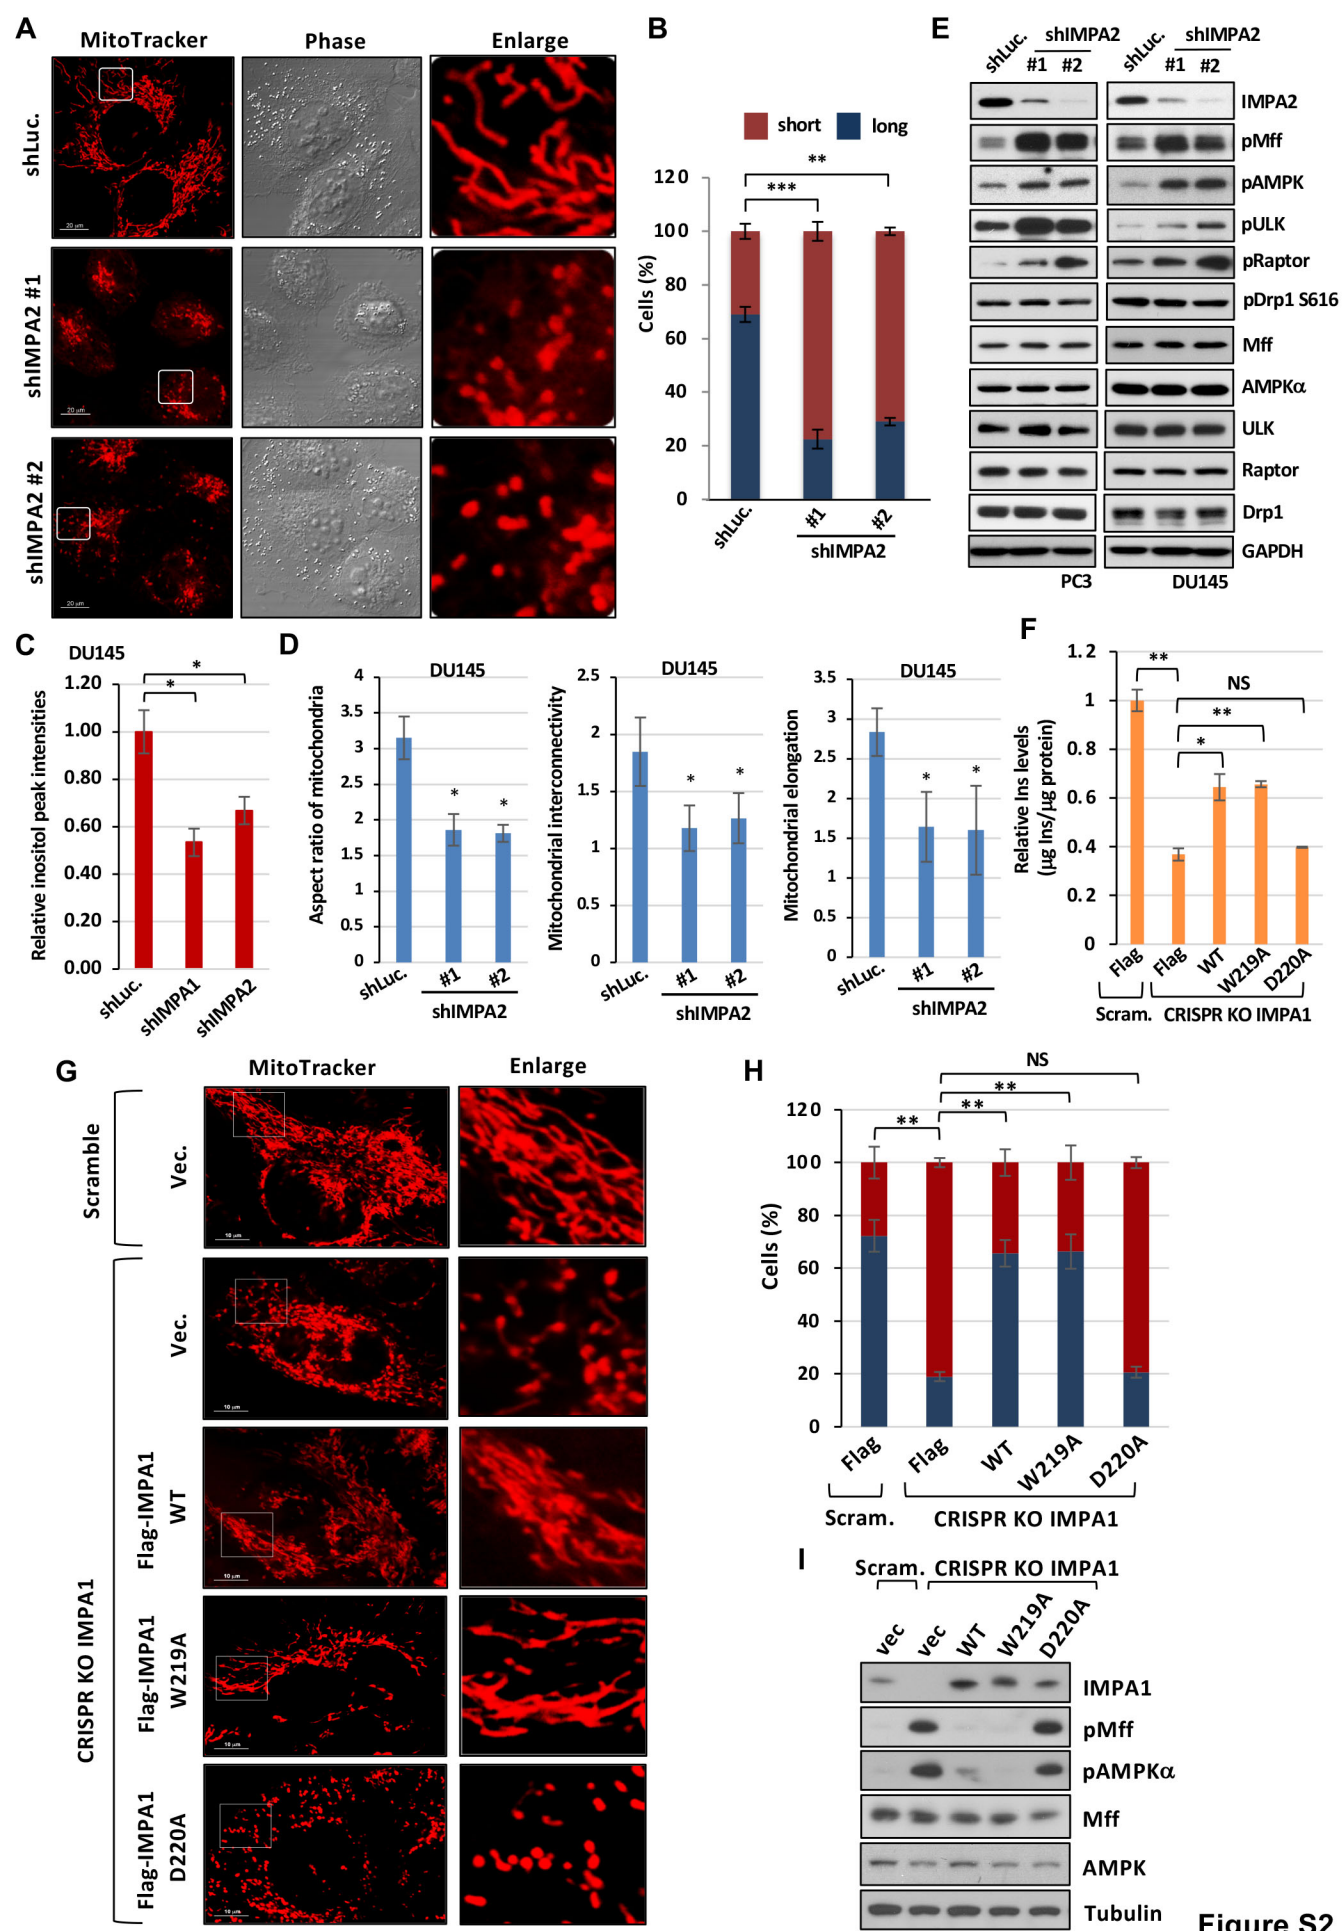

Figure S2



**Figure S2. Restoration of inositol rescues aberrant mitochondrial fission upon IMPA loss, Related to Figure 2.**

(A) Confocal images in DU145 cells stably transduced with shLuc. or shIMPA2. Scale bar, 20  $\mu\text{m}$ . (B) Quantification of the mitochondrial morphology of the DU145 cells shown in (A). (C) Metabolic profiling of inositol in DU145 cells expressing shLuc., shIMPA1 and shIMPA2 was performed. (D) Graphic respectively represents individual mitochondrial aspects ratio, interconnectivity and elongation in DU145 cells expressing shLuc. or shIMPA2 after quantitative image analysis. (E) Immunoblotting of the PC3 or DU145 cells stably transduced shLuc. or shIMPA2. (F) The levels of inositol in DU145 scramble (Scram.) or IMPA1 knockout by CRISPR/Cas9 cells upon indicated plasmid overexpression were determined by K-INOSL assay kit. (G) Confocal images in DU145 scramble (Scram.) or IMPA1 knockout by CRISPR/Cas9 cells upon indicated plasmid overexpression. Scale bar, 10  $\mu\text{m}$ . (H) Quantification of the mitochondrial morphology of the DU145 cells shown in (G). (I) Immunoblotting of CRISPR/Cas9 knockout cells transduced with the guide RNA pairs of scramble or IMPA1 upon indicated plasmid overexpression with indicated antibodies.

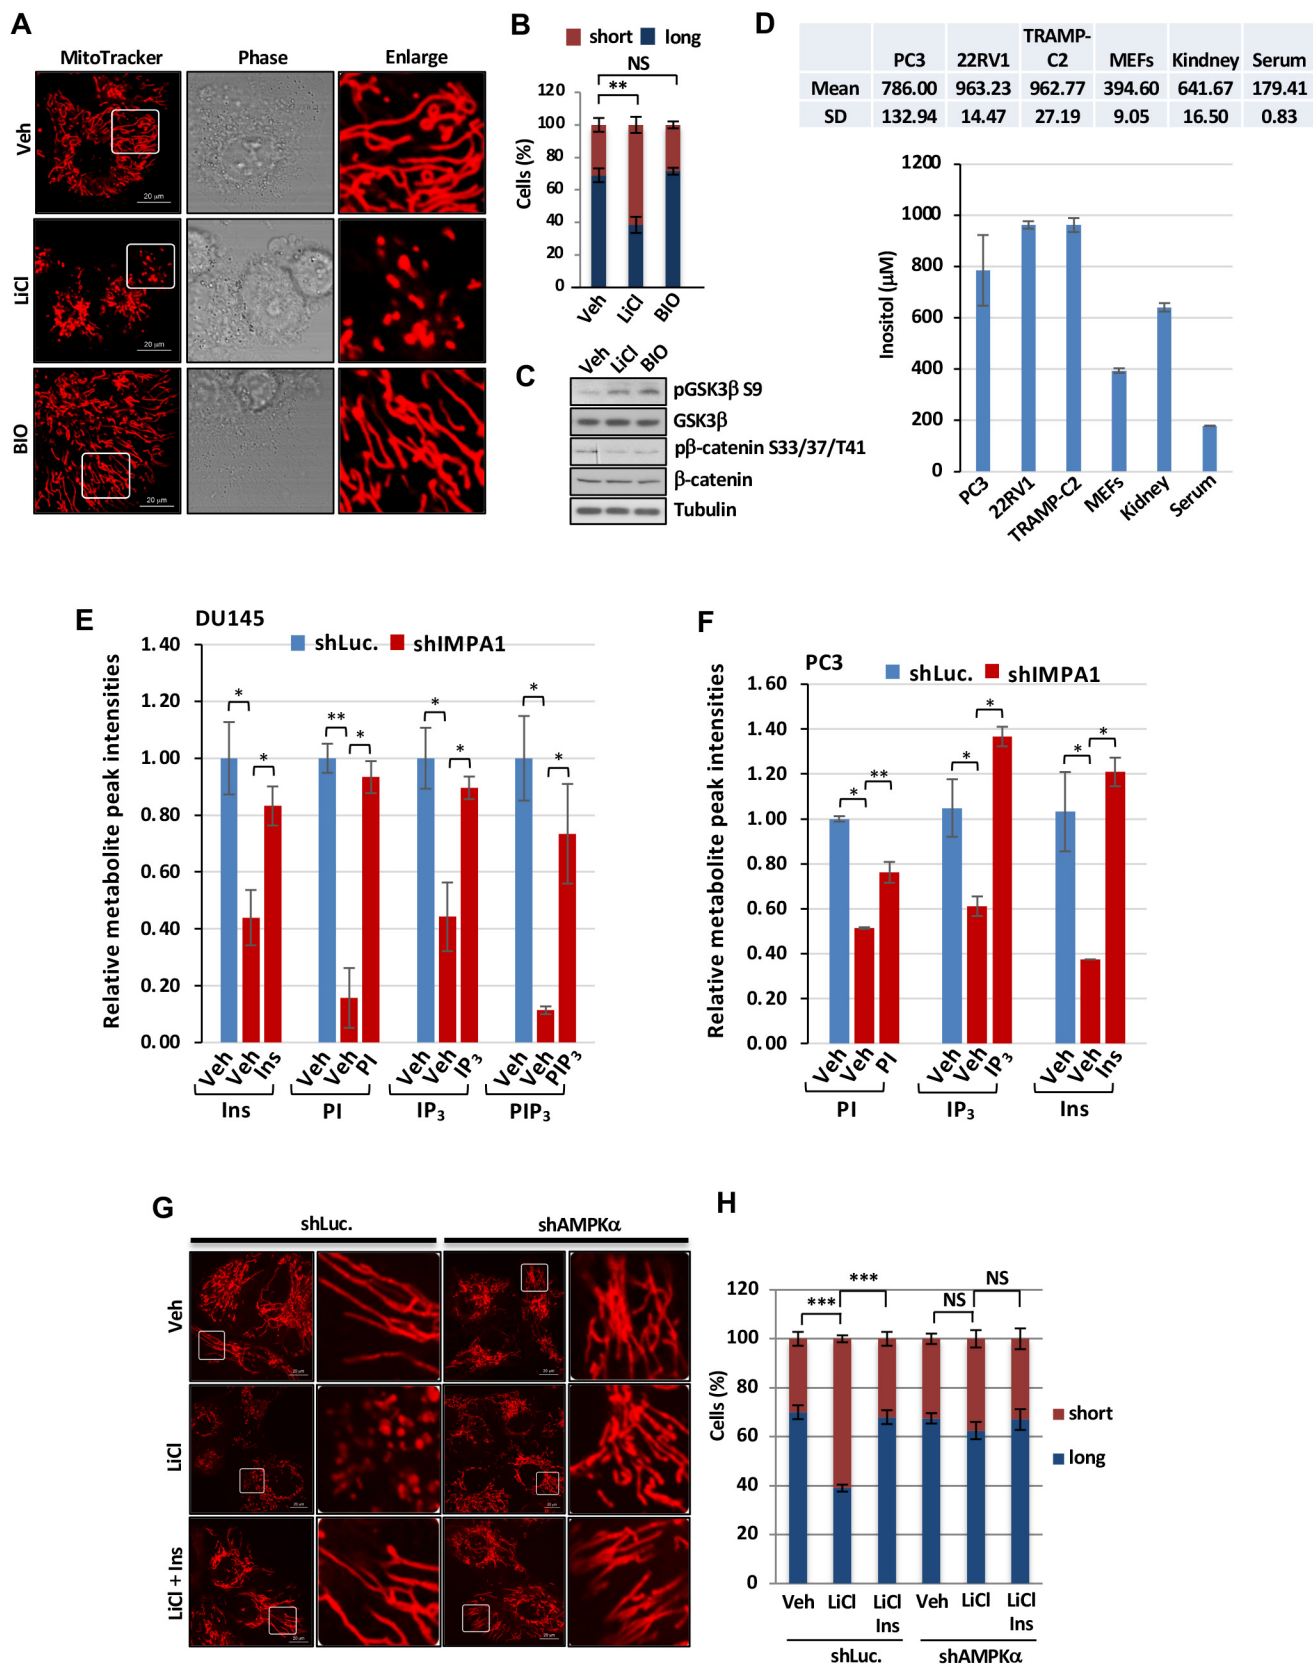

Figure S3

**Figure S3. Restoration of inositol rescues aberrant mitochondrial fission upon IMPA inhibition by lithium chloride, Related to Figure 2.**

(A) Representative confocal images by MitoTracker upon 500  $\mu$ M of lithium chloride (LiCl) or 10  $\mu$ M of BIO treatment for 30 minutes in DU145 cells. Veh, vehicle. (B) Quantification of the mitochondrial morphology of the cells shown in (A). Colors indicate the mitochondrial morphology (long or short). (C) Immunoblotting of DU145 cells upon vehicle (Veh), 500  $\mu$ M of lithium chloride (LiCl) or 10  $\mu$ M of BIO treatment. (D) The physiological concentration of inositol in diverse cells, mouse kidney and serum were determined. Three male mice were analyzed in each group. (E and F) Metabolic profiling of Ins, PI, IP<sub>3</sub> or PIP<sub>3</sub> in DU145 or PC3 cells expressing shIMPA1 upon vehicle (Veh), 25  $\mu$ M of inositol (Ins), 4  $\mu$ M of phosphatidylinositol (PI), inositol trisphosphate (IP<sub>3</sub>) or phosphatidylinositol 3,4,5-bisphosphate (PIP<sub>3</sub>) treatment was performed. (G) Representative confocal images in DU145 cells stably expressing shLuc. or shAMPK $\alpha$  (#1) upon non-treatment (NT), 500  $\mu$ M of LiCl or 500  $\mu$ M of LiCl plus Ins treatment for 30 minutes. Scale bar, 20  $\mu$ m. (H) Quantification of the mitochondrial morphology of the cells shown in (G). Colors indicate the mitochondrial morphology (long or short).

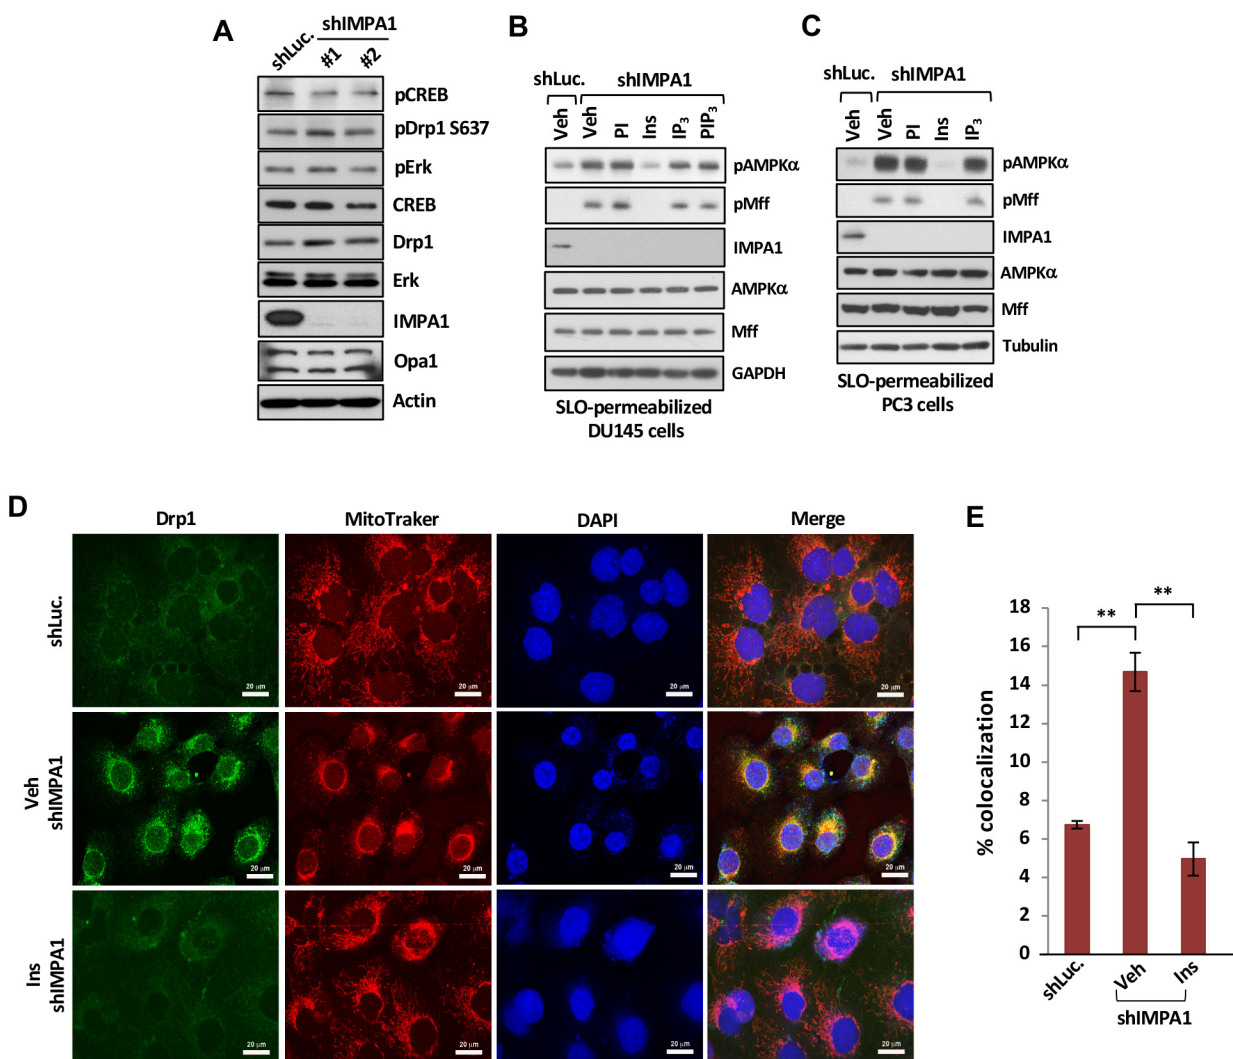

Figure S4

**Figure S4. Restoration of inositol rescues aberrant mitochondrial fission upon IMPA knockdown independently of its intermediates of phosphatidylinositol cycle, Related to Figure 2.** (A) Immunoblotting of PC3 cells stably transduced with shLuc. or IMPA1-two specific shRNAs. (B and C) Immunoblotting of DU145 or PC3 cells stably expressing shLuc. or shIMPA1 preincubated with streptolysin O (SLO) for 5 minutes upon Ins, PI, IP<sub>3</sub> or PIP<sub>3</sub> treatment for 15 minutes. (D) Representative confocal images of DU145 cells stably transduced with shLuc. or shIMPA1 upon vehicle (Veh) or Ins treatment for 24 hours stained by MitoTracker Red FM (red) and Drp1 antibody (green). Scale bar, 20  $\mu$ m. (E) Quantification of colocalization of MitoTracker and Drp1 by ImageJ. Representative immunoblotting blots for each dataset were presented from at least three times of the repeated experiments.

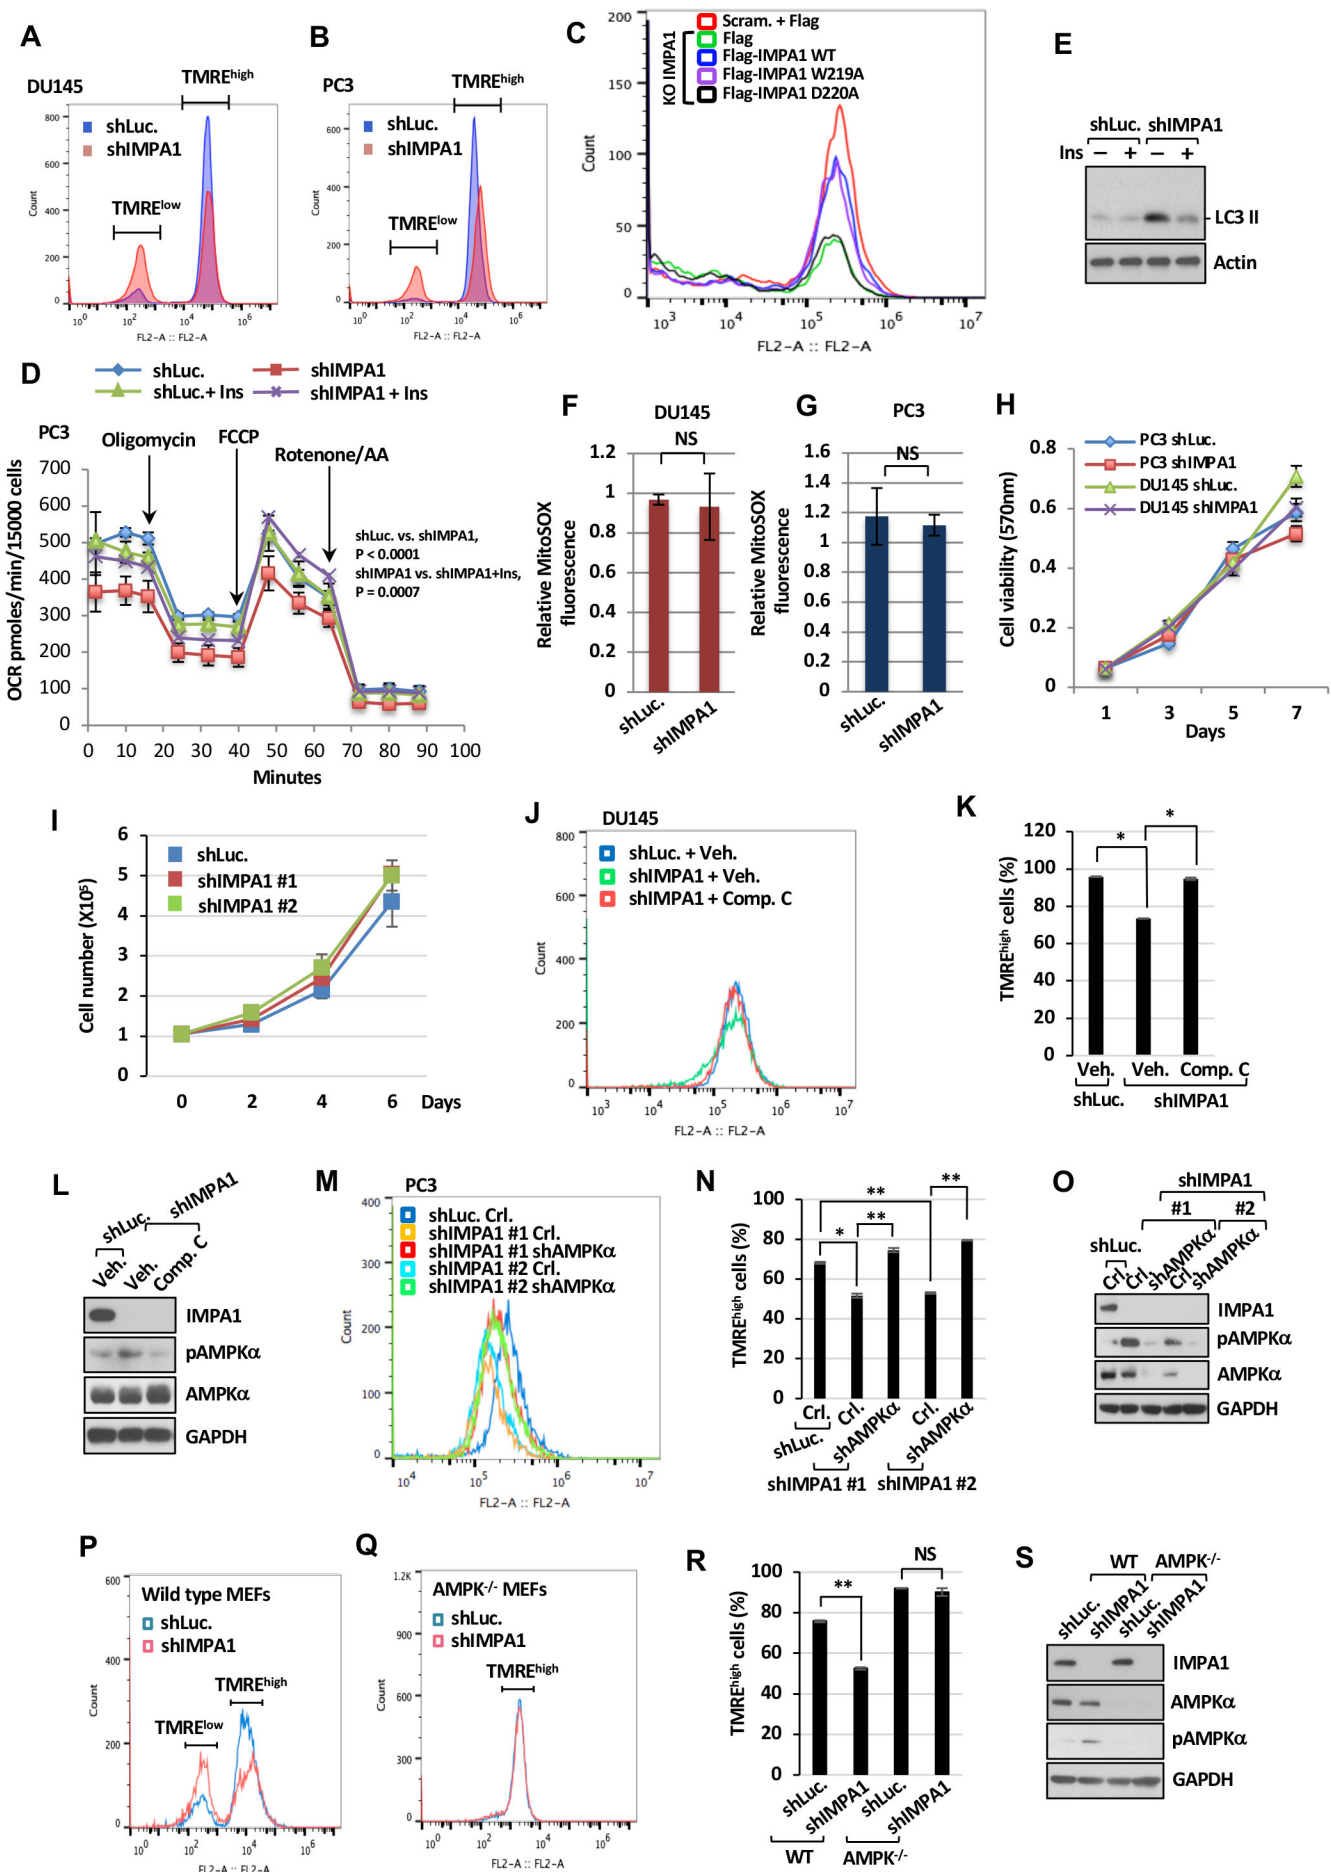

Figure S5



**Figure S5. IMPA1/Inositol regulates mitochondrial respiration and inositol decline upon IMPA1 loss induces decrease of mitochondrial membrane potential in an AMPK-dependent manner, Related to Figure 3 and 4.**

(A and B) Mitochondrial membrane potential ( $\Delta\Psi_m$ ) in DU145 or PC3 cells stably expressing shLuc. or shIMPA1 incubated with Tetramethylrhodamine ethyl ester perchlorate (TMRM) was determined by flow cytometry analysis. (C)  $\Delta\Psi_m$  in DU145 scramble (Scram.) or IMPA1 knockout by CRISPR/Cas9 cells upon indicated plasmid overexpression was determined by flow cytometry analysis. (D) Oxygen consumption rate (OCR) was determined by Seahorse Mito Stress analysis. The PC3 cells stably expressing shLuc. or shIMPA1 upon vehicle or Ins treatment and exposed to oligomycin, FCCP and rotenone/antimycin A. OCR was measure as pmole  $O_2$ /min/15000 cells. (E) Immunoblotting of LC3 expression in PC3 cells stably expressing shLuc. or IMPA1 upon vehicle or inositol treatment. (F and G) Quantification of mitochondrial ROS levels in DU145 or PC3 cells stably transduced with shLuc. or shIMPA1 by flow cytometry. NS, non-significant. (H) Cell survival was analyzed by MTT assay (I) Cell growth in shLuc. or shIMPA1 PC3 cells was determined by cell counting using trypan blue. (J)  $\Delta\Psi_m$  in DU145 cells stably expressing shLuc. or shIMPA1 upon vehicle (Veh.) or 10  $\mu$ M of Compound C (Comp. C) treatment was determined by flow cytometry analysis. (K) The percentage cells with TMRM<sup>high</sup>, defined by the gate shown in (A and B) in (J) was quantified by flow cytometry analysis. (L) Immunoblotting of DU145 cells stably expressing shLuc. or shIMPA1 upon Veh or Comp. C treatment. (M)  $\Delta\Psi_m$  in PC3 cells stably expressing shLuc., shIMPA1 #1, shIMPA1 #2 or shAMPK $\alpha$  #1 was determined by flow cytometry analysis. (N) The percentage cells with TMRM<sup>high</sup> in (M) was quantified by flow cytometry analysis. (O) Immunoblotting of PC3 cells stably expressing shLuc., shIMPA1 #1, shIMPA1 #2 or shAMPK $\alpha$  #1. (P and Q)  $\Delta\Psi_m$  in wild type MEFs or AMPK<sup>-/-</sup> MEFs stably expressing shLuc. or shIMPA1 #1. (R) The percentage cells with TMRM<sup>high</sup> in (P and Q) was quantified by flow cytometry analysis. (S) Immunoblotting of wild type MEFs or AMPK<sup>-/-</sup> MEFs stably expressing shLuc. or shIMPA1 #1.

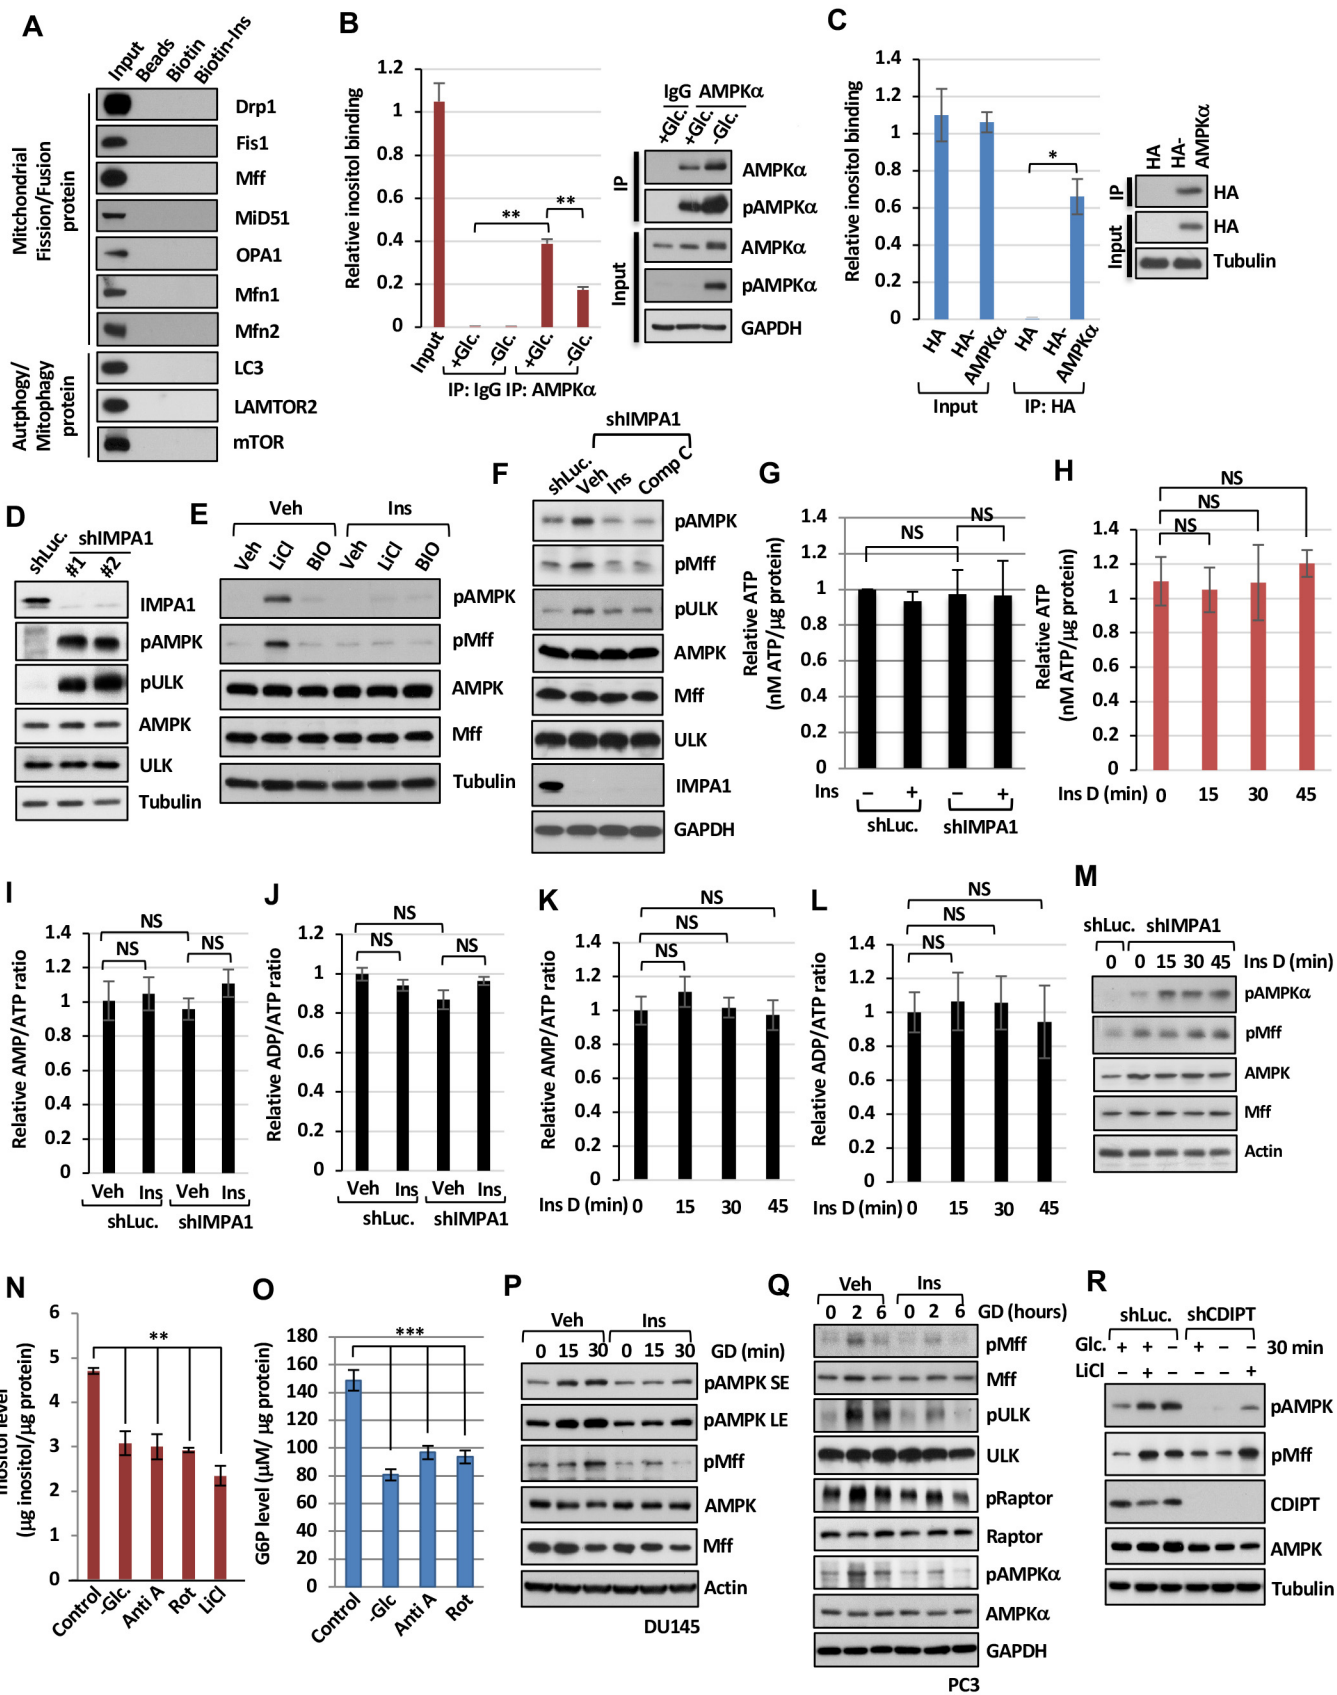

Figure S6

**Figure S6. Inositol decline promotes AMPK activation and mitochondrial fission upon stress conditions, Related to Figure 5.** (A) 40  $\mu$ M of Biotin or Biotin-Ins pulled down and subjected to immunoblotting in PC3 cells. (B) PC3 cells cultured in medium containing 25 mM glucose (+Glc.) or no glucose (-Glc.) were immunoprecipitated with IgG or AMPK $\alpha$ , followed by the elution of metabolites with 80% methanol. The amount of inositol was determined. Immunoprecipitation efficacy was examined by immunoblotting with indicated antibodies. (C) The amount of inositol in HA or HA-AMPK $\alpha$  PC3 cells was determined. (D) Immunoblotting of DU145 cells stably expressing shLuc. or shIMPA1. (E) Immunoblotting of PC3 cells upon 500  $\mu$ M of lithium chloride, 10  $\mu$ M of BIO treatment or in combination with Ins treatment. (F) Immunoblotting of shLuc. or shIMPA1 in PC3 cells with vehicle (Veh), Ins or Comp C treatment. (G) The ATP levels in DU145 cells expressing shLuc. or shIMPA1 upon with or without Ins treatment were determined. NS, non-significant. (H) The ATP levels in MEFs upon inositol (Ins) deprivation were determined. (I and J) Metabolic profiling of AMP/ATP and ADP/ATP ratio in DU145 cells expressing shLuc. or shIMPA1 upon vehicle (Veh) or Ins treatment were performed by targeted mass spectrometry analysis. (K and L) Metabolic profiling of AMP/ATP and ADP/ATP ratio in MEFs upon Ins deprivation were performed. (M) Immunoblotting of MEFs stably expressing shLuc. or shIMPA1 upon Ins deprivation (Ins D) (N) The levels of inositol in DU145 cells upon vehicle (control), glucose deprivation (-Glc.), 10  $\mu$ M of antimycin A (Anti A), 250 ng/ml of rotenone (Rot) or 500  $\mu$ M of LiCl is determined. (O) The levels of G6P in DU145 cells upon vehicle (control), -Glc., Anti A or Rot treatment is determined by G6P colorimetric assay kit. (P and Q) Immunoblotting of DU145 or PC3 cells upon glucose deprivation (GD) with or without Ins treatment for various times. (R) Immunoblotting of PC3 cells stably expressing shLuc. or shCDIPT upon glucose deprivation or 500  $\mu$ M of lithium chloride treatment.

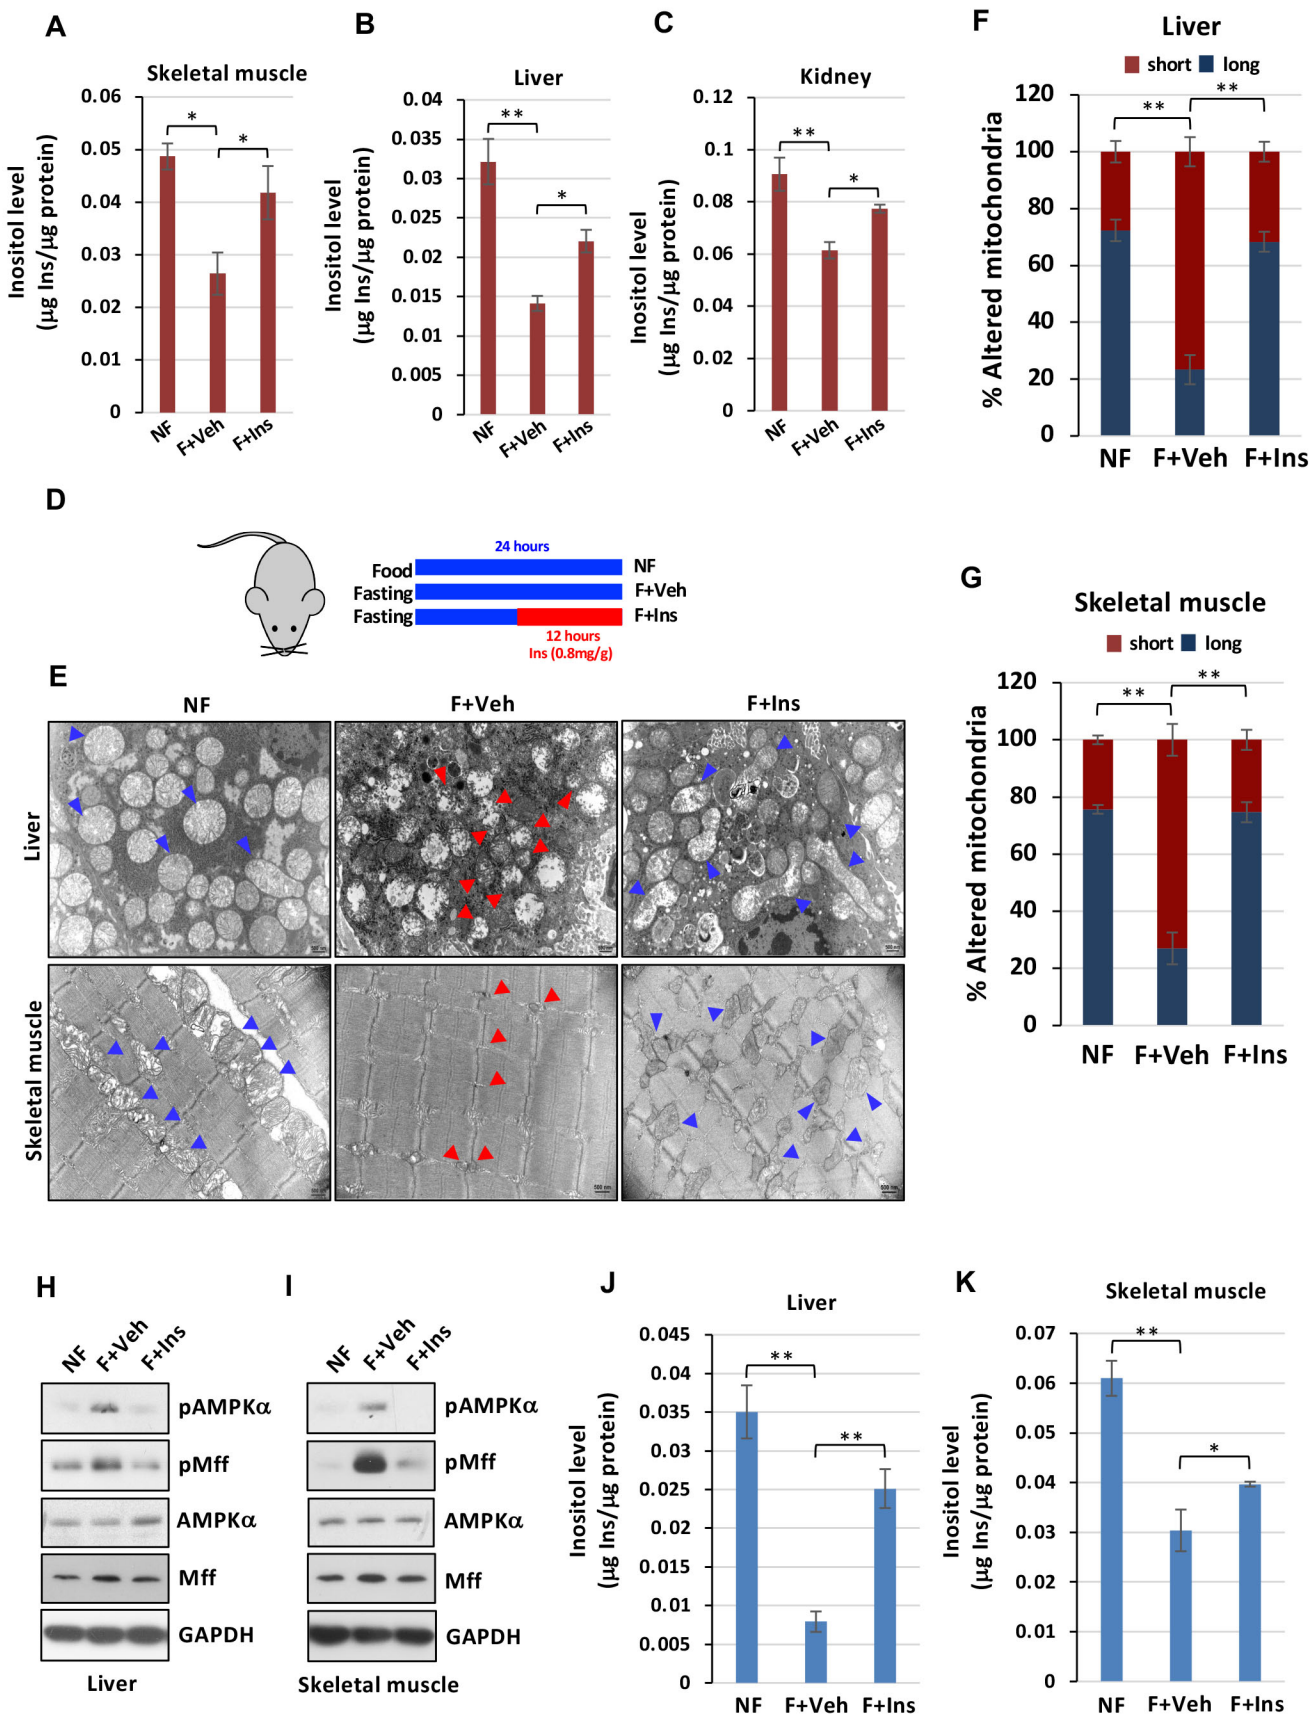

Figure S7

**Figure S7. Inositol decline leads to AMPK activation and mitochondrial fission in fasted mice, Related to Figure 5.** (A-C) mice fasted for 24 hours and inositol (Ins) treatment by intraperitoneal injection (IP) at the time point mice fasted for 18 hours. The levels of inositol in tibialis anterior, liver and kidney of mice fed with food, no fasting (NF), fasted with vehicle (F+Veh) or fasted with Ins (F+Ins) was determined. Three male mice were analyzed in each group. (D) The graphic shows mice fasted for 12 hours followed by oral administration of vehicle or Ins by drinking water (0.8 mg/g) for 12 hours under fasting conditions. (E) Representative images of transmission electron microscope upon mice fed with food, no fasting (NF), fasted with vehicle (F+Veh) and fasted with Ins (0.8 mg/g) by drinking water (F+Ins). Blue arrow, healthy/elongated mitochondria; Red arrows, fragmented mitochondria. Scale bar, 500 nm. (F and G) Quantification of the mitochondrial morphology (long and short) shown in (E). (H and I) The proteins extracted from tissues of liver and skeletal muscle (from tibialis anterior) were subjected to Immunoblotting. (J and K) mice fasted for 12 hours, followed by oral administration of vehicle or Ins by drinking water (0.8 mg/g) for 12 hours under fasting conditions. Ins was delivered via water to mice at the dose of 0.8 mg/g of body weight. The levels of Ins in liver and tibialis anterior of mice fed with food, no fasting (NF), fasted with vehicle (F+Veh) or fasted with Ins (F+Ins) were determined.

**A**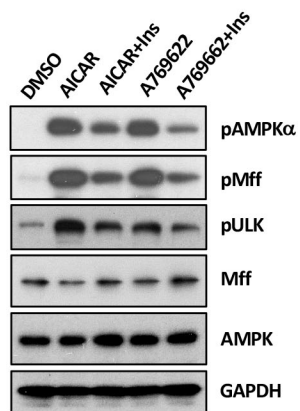**C**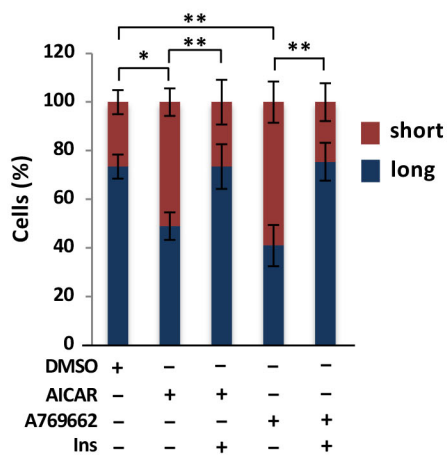**B**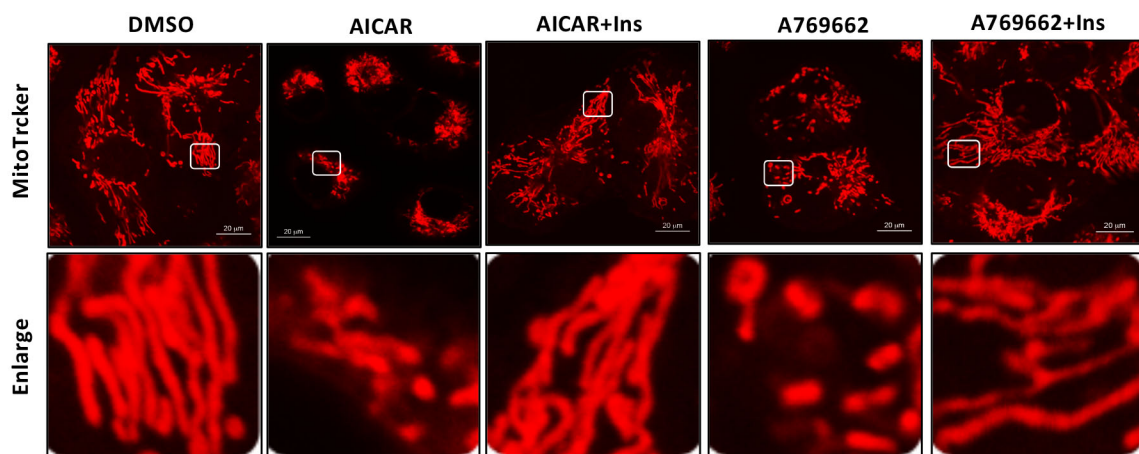**D**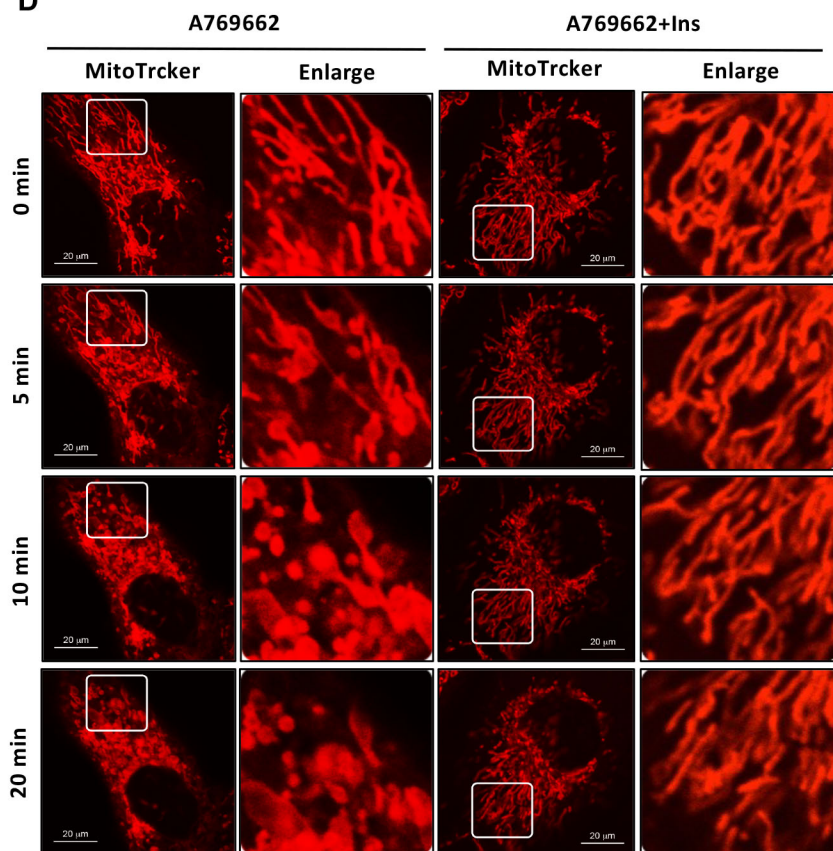**E**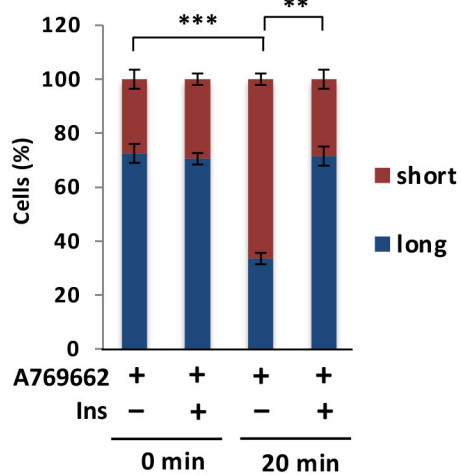



**Figure S8. Inositol inhibits mitochondrial fission induced by various AMPK activators, Related Figure 6.** (A) Immunoblotting of PC3 cells upon DMSO, 2 mM of AICAR, 300  $\mu$ M of A769662 with or without 25  $\mu$ M of Ins treatment for 1 hour. (B) Representative confocal images in DU145 cells upon DMSO, 2 mM of AICAR, 300  $\mu$ M of A769662 with or without 25  $\mu$ M of Ins treatment for 1 hour. Scale bar, 20  $\mu$ m. (C) Quantification of the mitochondrial morphology of the cells shown in (B). Colors indicate the mitochondrial morphology (long or short). (D) Time-lapse images of DU145 cells stained with MitoTracker Red FM (red) upon A769662 with or without Ins treatment. A magnification of a portion of mitochondria was included for each image. Scale bar, 20  $\mu$ m. (E) Quantification of the mitochondrial morphology of the cells shown in (D) at 0 min or 20 min. Colors indicate the mitochondrial morphology (long or short). Representative immunoblotting blots for each dataset were presented from at least three times of the repeated experiments.

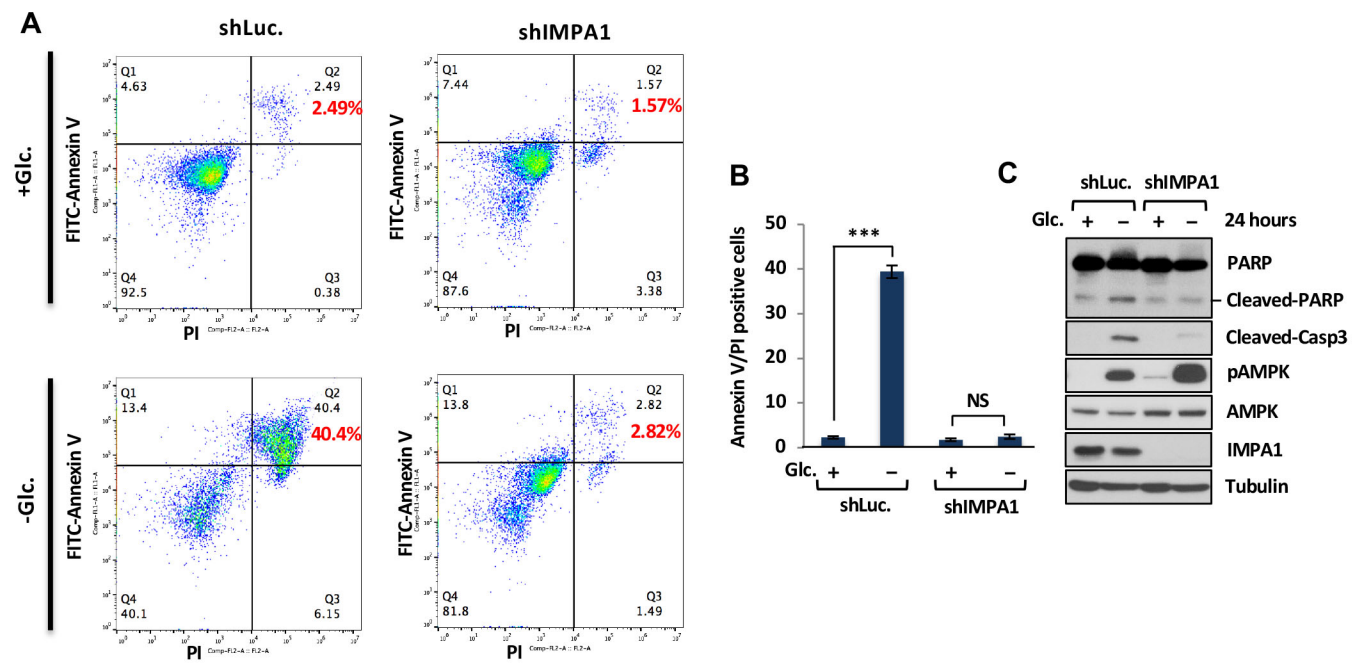

Figure S9

**Figure S9. IMPA1 regulates AMPK activity and cell survival upon glucose deprivation, Related to Figure 6.** (A) The MEFs stably expressing shLuc. or shIMPA1 upon glucose deprivation (-Glc.) for 24 hours were incubated with Annexin V-FITC and propidium iodide (PI), followed by flow cytometry analysis. (B) Quantification of Annexin V/PI-positive cells by flow cytometry. (C) Immunoblotting of MEFs stably expressing shLuc. or shIMPA1 upon glucose deprivation for 24 hours. Representative immunoblotting blots for each dataset were presented from at least three times of the repeated experiments.

**A**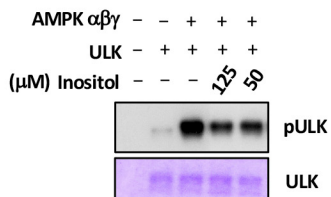**B**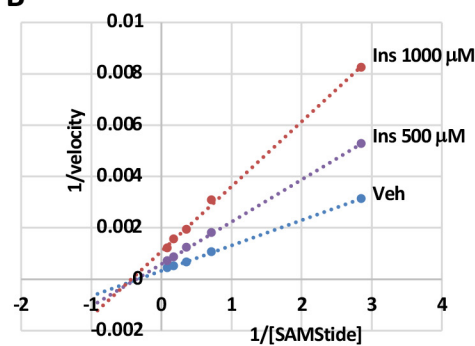**C**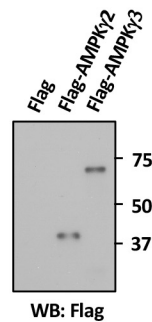**D**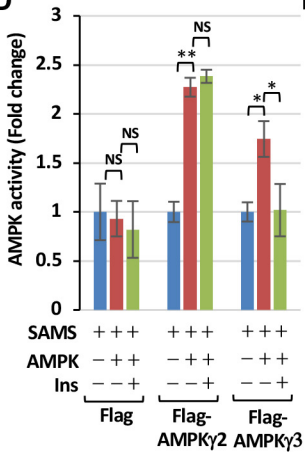**E**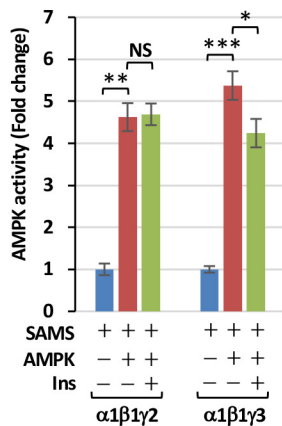**F**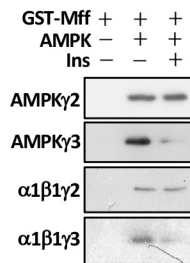**G**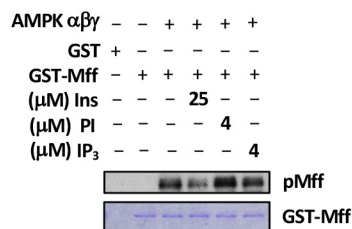**H**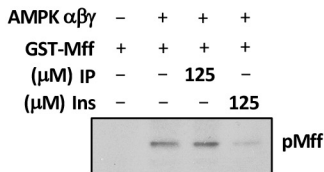**I**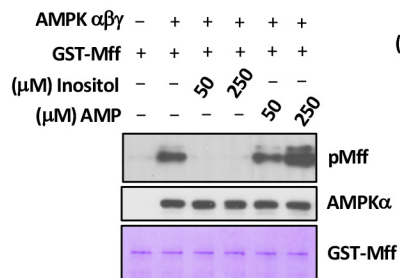**J**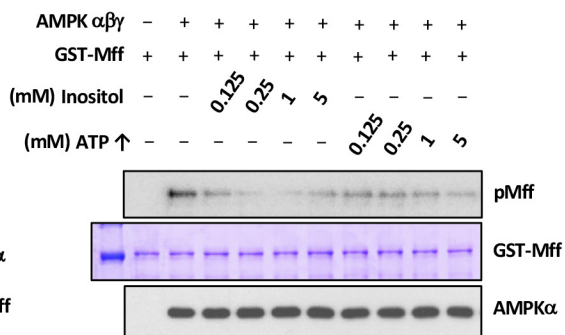**K**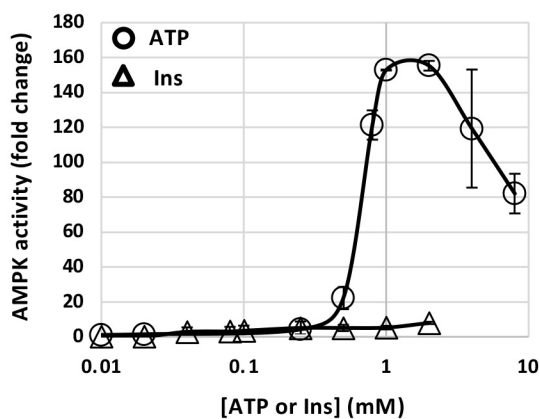**L**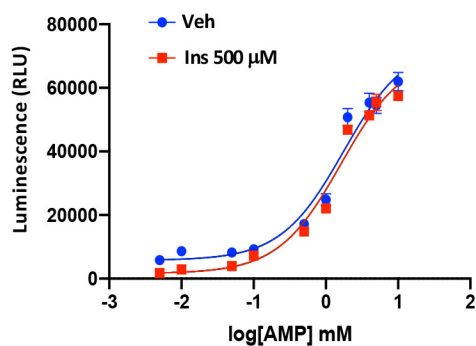**M**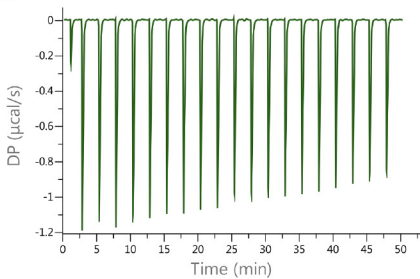**N**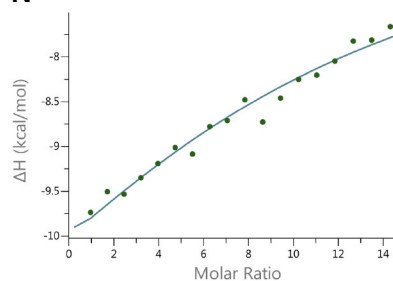**O**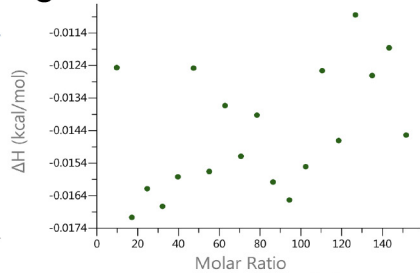

**Figure S10. Inositol inhibits AMPK complex activity and directly binds to AMPK $\gamma$  subunit, Related to Figure 7.** (A) AMPK kinase activity with fixed amount of ATP (0.5 mM) was determined by immunoblotting with phospho-ULK S555 antibody. (B) Linweaver-Burk plot for non-competitive inhibition of inositol on AMPK-catalyzed SAMS peptide phosphorylation was determined by using 1/velocity of Michaelis-Menten curve plot versus 1/the concentration of SAMS peptide. (C) Immunoblotting of purified proteins of Flag vector control, Flag-AMPK $\gamma$ 2 and Flag-AMPK $\gamma$ 3 with Flag antibody. (D) Flag vector control, Flag-AMPK $\gamma$ 2 and Flag-AMPK $\gamma$ 3 complexes kinase activity was determined by ADP-Glo<sup>TM</sup> kinase assay (E) Diverse AMPK complex kinase activity was determined by ADP-Glo<sup>TM</sup> kinase assay. (F) Diverse AMPK complexes kinase activity was determined by immunoblotting with phospho-Mff S146 antibody. (G) AMPK kinase activity upon 25  $\mu$ M of Ins, 4  $\mu$ M of PI or IP<sub>3</sub> incubation was determined by immunoblotting with phospho-Mff S146 antibody. (H) AMPK kinase activity by adding IP or Ins was determined by immunoblotting with phospho-Mff S146 antibody. (I) AMPK kinase activity by adding inositol or AMP was determined by immunoblotting with phospho-Mff S146 antibody. (J) AMPK kinase activity by adding Ins or ATP was determined by immunoblotting with phospho-Mff S146 antibody. (K) AMPK enzymatic activity curve (fold change) in response to ATP or Ins concentrations using SAMS peptide phosphorylation assay. Data were fitted to the equation  $Y = \text{basal} + \{[(\text{activation} \times \text{basal} - \text{basal}) \times X] / (\text{EC}_{50} + X)\}$  and then normalized with basal, where Y is kinase activity and X is ATP or Ins concentrations. (L) AMPK enzymatic activity curve (RLU, relative light units) in response to AMP concentrations with or without inositol (500  $\mu$ M) using SAMS peptide phosphorylation assay. (M and N) The binding between inositol and GST-AMPK $\gamma$  was determined by isothermal titration calorimetry (ITC) assay with dissociation constant ( $K_d$ ) of 469  $\mu$ M. (O) The binding between inositol and GST was determined by isothermal titration calorimetry (ITC) assay as a control to rule out non-specific binding.

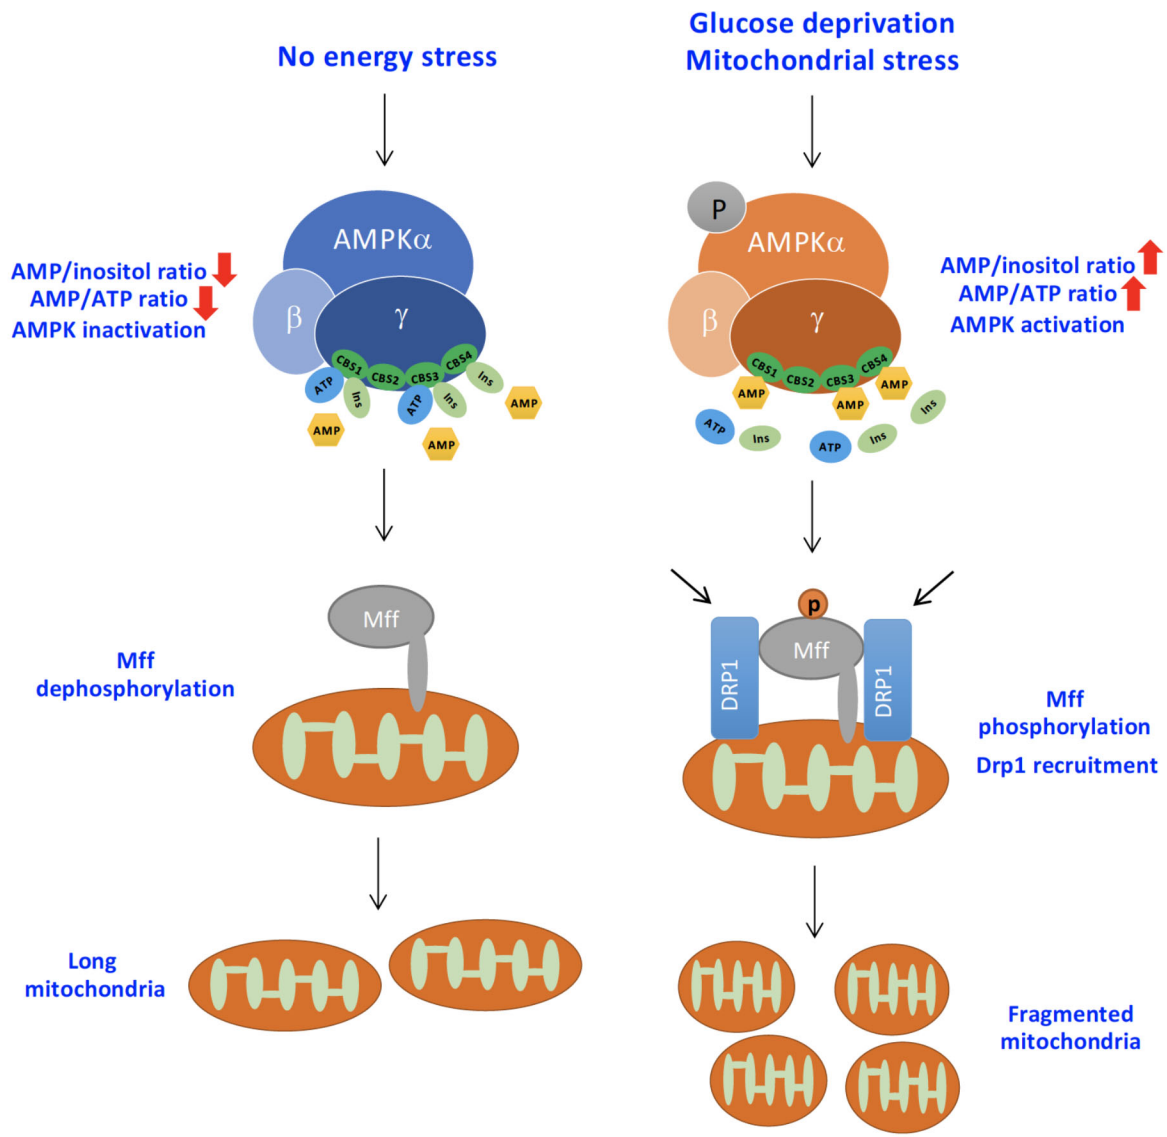

Figure S11



**Figure S11. Working model for inositol in restricting AMPK activation and mitochondrial fission, Related to Figure 5, 6 and 7.** Inositol serves as an endogenous suppressor to limit AMPK activation and mitochondrial fission through its binding to the AMPK $\gamma$  subunit. In normal physiological conditions without energy stress, inositol and ATP levels are high and both inositol and ATP bind to AMPK $\gamma$  to repress AMPK activity and mitochondrial fission; however, under energy stresses or bioenergetic failure such as glucose deprivation and mitochondrial damage, inositol and ATP levels decline, accompanied with the increase in AMP level, hence allowing for AMP binding to AMPK $\gamma$  subunit to induce AMPK activation and subsequent mitochondrial fission. This model suggests that both AMP/inositol and AMP/ATP ratio serve as critical determinants for AMPK activation and mitochondrial fission, offering the molecular insight into how metabolic stress drives AMPK activation. AMPK is therefore an inositol sensor orchestrating mitochondrial fission by detecting the inositol gradient in cells.
